# Supplementary material for: Unravelling the rate of action of hits in the Leishmania donovani box using standard drugs amphotericin B and miltefosine
Source: PLOS journal article supplement (doi:10.1371/journal.pntd.0005629), 2017-05-25
Supplement: S7 (10.1371/journal.pntd.0005629.s007) [file journal.pntd.0005629.s007]

| TCMDC ID | $\Delta 96h-24h$ | $\Delta 96h-48h$ | Gr | TCMDC ID | $\Delta 96h-24h$ | $\Delta 96h-48h$ | Gr | Gr'  | TCMDC ID    | $\Delta 96h-24h$ | $\Delta 96h-48h$ | Gr     | Gr' |
|----------|------------------|------------------|----|----------|------------------|------------------|----|------|-------------|------------------|------------------|--------|-----|
| 125826   | 0.11             | 0.00             | 1  | 143305   | 0.23             | 0.13             | 1  |      | 143164      | >1.3             | 0.20             | 2      |     |
| 142900   | 0.04             | 0.03             | 1  | 143350   | 0.28             | 0.11             | 1  |      | 143252      | >0.92            | 0.31             | 2      |     |
| 143090   | 0.09             | 0.04             | 1  | 143404   | 0.02             | 0.07             | 1  |      | 143274      | >0.78            | 0.39             | 2      |     |
| 143091   | -0.04            | 0.01             | 1  | 143406   | 0.26             | 0.13             | 1  |      | 143297      | 1.16             | 0.21             | 2      |     |
| 143092   | 0.14             | 0.12             | 1  | 143407   | 0.20             | 0.16             | 1  |      | 143315      | >1.35            | 0.28             | 2      |     |
| 143093   | 0.00             | 0.06             | 1  | 143427   | 0.10             | 0.04             | 1  |      | 143391      | >1.23            | 0.49             | 2      |     |
| 143094   | 0.08             | 0.29             | 1  | 143447   | 0.22             | 0.21             | 1  |      | 143398      | >1.38            | 0.34             | 2      |     |
| 143095   | 0.02             | 0.13             | 1  | 143459   | 0.42             | 0.15             | 1  |      | 143633      | >1.5             | 0.25             | 2      |     |
| 143101   | 0.06             | 0.13             | 1  | 143486   | 0.20             | 0.06             | 1  |      | 143141      | >0.87            | 0.66             | 2 or 3 |     |
| 143113   | 0.17             | 0.04             | 1  | 143489   | 0.26             | 0.05             | 1  |      | 143196      | >0.89            | 0.65             | 2 or 3 |     |
| 143122   | 0.08             | 0.08             | 1  | 143491   | 0.25             | 0.15             | 1  |      | 143351      | >1.27            | 0.68             | 2 or 3 |     |
| 143133   | 0.18             | 0.16             | 1  | 143501   | 0.19             | 0.10             | 1  |      | 143431      | >0.84            | 0.51             | 2 or 3 |     |
| 143144   | 0.10             | 0.04             | 1  | 143524   | 0.09             | 0.01             | 1  |      | 124508      | >0.83            | >0.83            | 3 or 2 |     |
| 143145   | 0.04             | -0.05            | 1  | 143557   | 0.07             | 0.12             | 1  |      | 143139      | >0.88            | >0.88            | 3 or 2 |     |
| 143168   | -0.04            | 0.04             | 1  | 143558   | 0.15             | 0.05             | 1  |      | 143140      | >0.72            | >0.72            | 3 or 2 |     |
| 143180   | 0.20             | 0.10             | 1  | 143570   | 0.31             | 0.20             | 1  |      | 143129      | >0.95            | >0.95            | 3      |     |
| 143211   | 0.08             | -0.01            | 1  | 143584   | 0.38             | 0.21             | 1  |      | 143174      | >0.94            | >0.94            | 3      |     |
| 143212   | 0.18             | 0.09             | 1  | 143586   | 0.03             | 0.01             | 1  |      | 143327      | >1.61            | >1.61            | 3      |     |
| 143213   | 0.12             | 0.05             | 1  | 143607   | 0.38             | 0.20             | 1  |      | 143344      | >1.08            | >1.08            | 3      |     |
| 143214   | 0.14             | 0.09             | 1  | 143621   | 0.23             | 0.23             | 1  |      | 143345      | >0.8             | >0.8             | 3      |     |
| 143216   | 0.11             | 0.10             | 1  | 143639   | 0.15             | 0.07             | 1  |      | 143347      | >1.59            | 1.19             | 3      |     |
| 143217   | 0.11             | 0.05             | 1  | 143647   | 0.15             | 0.04             | 1  |      | 143358      | >1.09            | >1.09            | 3      |     |
| 143218   | 0.08             | -0.02            | 1  | 143166   | 0.67             | 0.09             | 1  | or 2 | 143591      | >1.01            | >1.01            | 3      |     |
| 143236   | 0.06             | -0.03            | 1  | 143296   | 0.68             | 0.16             | 1  | or 2 | Ampho B     | 0.2              | 0.04             | 1      |     |
| 143261   | 0.17             | 0.06             | 1  | 143517   | 0.78             | 0.06             | 2  | or 1 | Miltefosine | 1.04             | 0.52             | 2      |     |
